# Supplementary material
Source: ML conference proceedings conference paper supplement (https://proceedings.mlr.press/v48/newling16.html)
Supplement: Supplementary file 1 [file newling16-supp.pdf]

## B Proofs

We will use subscripts to denote rounds of  $k$ -means, and  $B(x, r)$  to denote the closed ball centered on  $x$  of radius  $r$ .

### B.1 Proof of correctness of Elkan's algorithm update

By the definition of the lower bound update,

$$l_{t_0+1}(i, j) = l_{t_0}(i, j) - p_{t_0}(j).$$

Using that  $l_{t_0}$  is a valid bound, the definition of  $p_{t_0}$ , and the triangle inequality,

$$\begin{aligned} &\leq \|x(i) - c_{t_0}(j)\| - p_{t_0}(j), \\ &\leq \|x(i) - c_{t_0}(j)\| - \|c_{t_0}(j) - c_{t_0+1}(j)\| \\ &\leq \|x(i) - c_{t_0+1}(j)\|. \end{aligned}$$

Thus the lower bound update is valid. Similarly for the upper bound,

$$\begin{aligned} u_{t_0+1}(i, j) &= u_{t_0}(i) + p_{t_0}(a(i)), \\ &\geq \|x(i) - c_{t_0}(a(i))\| + p_{t_0}(a(i)), \\ &\geq \|x(i) - c_{t_0}(a(i))\| + \\ &\quad \|c_{t_0}(a(i)) - c_{t_0+1}(a(i))\|, \\ &\geq \|x(i) - c_{t_0+1}(a(i))\|. \end{aligned}$$

This proves that the upper bound update is valid.

### B.2 Proof of correctness of Elkan's algorithm intercentroid test

Suppose that,

$$\frac{cc(a(i), j)}{2} > u(i).$$

Then, by the triangle inequality and previous definitions,

$$\begin{aligned} \|c(j) - x(i)\| &\geq \|c(j) - c(a(i))\| - \\ &\quad \|c(a(i)) - x(i)\|, \\ &\geq cc(a(i), j) - u(i), \\ &\geq 2u(i) - u(i), \\ &\geq u(i). \end{aligned}$$

Thus  $c(a(i))$  is nearer to  $x(i)$  than  $c(j)$  is, and so  $j \neq n_1(i)$ .

### B.3 Proof of correctness of Annular algorithm test

Recall the definition of  $R(i)$ ,

$$R(i) = \max(u(i), \|x(i) - c(b(i))\|).$$

Following directly from this definition and the definition of  $u(i)$ , we have  $c(a(i)), c(b(i)) \in B(x(i), R(i))$ . Therefore by the definitions of  $n_1(i)$  and  $n_2(i)$ , we have that  $c(n_1(i)), c(n_2(i)) \in B(x(i), R(i))$ . The triangle inequality now provides

$$\| \|c(j)\| - \|x(i)\| \| > R(i) \implies \|c(j) - x(i)\| > R(i), \quad (1)$$

Thus by the definition of  $\mathcal{J}(i)$ ,

$$\mathcal{J}(i) = \{j : \| \|c(j)\| - \|x(i)\| \| \leq R(i)\},$$

we can say,

$$j \notin \mathcal{J}(i) \implies j \notin \{n_1(i), n_2(i)\}.$$

### B.4 Proof of correctness of Exponion algorithm test

Let  $nn(j) \in \{1, \dots, k\} \setminus \{j\}$  denote the index the cluster whose centroid is nearest to the centroid of cluster  $j$  other than  $j$ , that is the centroid at distance  $s(j)$  from centroid  $j$ .

By definitions we have

$$\begin{aligned} c(a(i)) &\in B(x(i), u(i)), \\ c(nn(a(i))) &\in B(c(a(i)), s(a(i))). \end{aligned}$$

Combining these we have

$$c(a(i)), c(nn(a(i))) \in B(x(i), u(i) + s(a(i))), \quad (2)$$

Basic geometric arguments provide

$$B(x(i), u(i) + s(a(i))) \subseteq B(c(a(i)), 2u(i) + s(a(i))). \quad (3)$$

From (2) we deduce that

$$c(n_1(i)), c(n_2(i)) \in B(x(i), u(i) + s(a(i))),$$

and hence by (3) we have

$$c(n_1(i)), c(n_2(i)) \in (c(a(i)), 2u(i) + s(a(i))),$$

completing the proof.

### B.5 Proof that ns upper bound is tighter than sn upper bound

$$\begin{aligned} u_{t_0+\delta t}^{ns}(i) &= u_{t_0}(i) + \left\| \sum_{t'=t_0}^{t_0+\delta t-1} c_{t'+1}(i) - c_{t'}(i) \right\|, \\ &\leq u_{t_0}(i) + \sum_{t'=t_0}^{t_0+\delta t-1} \|c_{t'+1}(i) - c_{t'}(i)\|, \\ &\leq u_{t_0+\delta t}^{sn}(i). \end{aligned}$$

## C Detailed descriptions

### C.1 The inner Yinyang test

We need some temporary notation to present the test which the Yinyang algorithm employs,

$$\begin{aligned} j_1(i, f) &= \arg \min_{j \in \mathcal{G}(f)} \|x(i) - c(j)\|, \\ j_2(i, f) &= \arg \min_{j \in \mathcal{G}(f) \setminus \{j_1(f)\}} \|x(i) - c(j)\|, \\ r_2(i, f) &= \|x(i) - c(j_2(f))\|. \end{aligned}$$

The Yinyang test hinges on the fact that centroids in  $\mathcal{G}(f)$  which lie beyond radius  $r_2(i, f)$  of  $x(i)$  do not affect the variable updates and can thus be ignored. Extending this, suppose we have bounds  $\tilde{r}_2(i, f)$  and  $\tilde{l}(i, j)$  for  $j \in \mathcal{G}$  such that  $\tilde{r}_2(i, f) > r_2(f)$  and  $\tilde{l}(i, j) < \|x(i) - c(j)\|$ . Then  $\tilde{r}_2(i, f) < \tilde{l}(i, j)$  means that centroid  $j$  can be ignored. It remains to define relevant bounds  $\tilde{r}_2(i, f)$  and  $\tilde{l}(i, j)$ .

For  $\tilde{r}_2(i, f)$ , one keeps track of the second nearest centroid found thus far while looping over the centroids in  $\mathcal{G}(f)$ . Then for  $\tilde{l}(i, j)$  we could take  $l(i, f)$ , but a better choice is  $\tilde{l}(i, j) - q(f) + p(j)$ , which replaces the maximum group displacement in the last round with the exact displacement of centroid  $j$ .

The Yinyang test to determine whether centroid  $j$  needs be considered is thus finally,

$$\begin{aligned} l(i, f) - q(f) + p(j) > \tilde{r}_2(i, f) &\implies \\ \text{centroid } j \text{ lies beyond radius } r_2, &\text{ can be ignored.} \end{aligned} \tag{4}$$

### C.2 SMN, MSN, MNS

A lower bound to at time  $t_0 + \delta_t$  on the distance from  $x(i)$  to a group of centroids with group index  $f$  can be computed in three different ways. Letting  $\Delta_{t_0, \delta_t}$  denote the update term in

$$l_{t_0 + \delta_t}(i, f) = \min_{j \in \mathcal{G}(i)} (\|x(i) - c_{t_0}(j)\|) - \Delta_{t_0, \delta_t},$$

the three possibilities are

$$\begin{aligned} \Delta_{t_0, \delta_t}^{SMN} &= \sum_{t'=t_0}^{t_0 + \delta_t - 1} \max_{j \in \mathcal{G}(i)} (\|c_{t'+1}(j) - c_{t'}(j)\|), \\ \Delta_{t_0, \delta_t}^{MSN} &= \max_{j \in \mathcal{G}(i)} \left( \sum_{t'=t_0}^{t_0 + \delta_t - 1} \|c_{t'+1}(j) - c_{t'}(j)\| \right), \\ \Delta_{t_0, \delta_t}^{MNS} &= \max_{j \in \mathcal{G}(i)} (\|c_{t_0 + \delta_t}(j) - c_{t_0}(j)\|). \end{aligned}$$

The term  $\Delta_{t_0, \delta_t}^{SMN}$  corresponds to the classic approach used in all previous works. The term  $\Delta_{t_0, \delta_t}^{MSN}$  corresponds to an intermediate where improved bounds can be obtained without storing centroids. The term  $\Delta_{t_0, \delta_t}^{MNS}$  corresponds to the approach providing the tightest bounds, and is the one we use throughout.

|       | Data set     | $d$ | $N$       |
|-------|--------------|-----|-----------|
| i     | birch        | 2   | 100,000   |
| ii    | europe       | 2   | 169,300   |
| iii   | urand2       | 2   | 1,000,000 |
| iv    | ldfpads      | 3   | 164,850   |
| v     | conflongdemo | 3   | 164,860   |
| vi    | skinseg      | 4   | 200,000   |
| vii   | tsn          | 4   | 200,000   |
| viii  | colormoments | 9   | 68,040    |
| ix    | mv           | 11  | 40,760    |
| x     | wcomp        | 15  | 165,630   |
| xi    | house16h     | 17  | 22,780    |
| xii   | keggnet      | 28  | 65,550    |
| xiii  | urand30      | 30  | 1,000,000 |
| xiv   | mnist50      | 50  | 60,000    |
| xv    | miniboone    | 50  | 130,060   |
| xvi   | covtype      | 55  | 581,012   |
| xvii  | uscensus     | 68  | 2,458,285 |
| xviii | kddcup04     | 74  | 145,750   |
| xix   | stl10        | 108 | 1,000,000 |
| xx    | gassensor    | 128 | 13,910    |
| xxi   | kddcup98     | 310 | 95,000    |
| xxii  | mnist784     | 784 | 60,000    |

Table 1: Fullnames of the 22 datasets used. All datasets are preprocessed such that features have mean zero and variance 1.

## D Full Results Tables



|       | mean iterations |      | mean fastest [s] |      |         |         |         |         |         |         |         |         |             |         |         |             |             |             |             |         |             |             |         |             |             |         |            |
|-------|-----------------|------|------------------|------|---------|---------|---------|---------|---------|---------|---------|---------|-------------|---------|---------|-------------|-------------|-------------|-------------|---------|-------------|-------------|---------|-------------|-------------|---------|------------|
|       | SD iterations   |      | SD fastest       |      | bay-sta | mlp-sta | pow-sta | vlf-sta | own-sta | bay-ham | mlp-ham | own-ham | bay-ann     | own-ann | own-exp | own-exp-ns  | own-syin    | own-syin-ns | pow-yin     | own-yin | own-selk    | own-selk-ns | bay-elk | mlp-elk     | vlf-elk     | own-elk | own-elk-ns |
| i     | 120             | 20.5 | 2.80             | 0.32 | 48.0    | 32.0    | 104     | 25.4    | 12.0    | 12.5    | 8.50    | 8.29    | <u>1.49</u> | 1.41    | 1.01    | <b>1.00</b> | 1.01        | 1.27        | 8.53        | 1.13    | 6.83        | 6.32        | 11.5    | 17.5        | 16.3        | 5.54    | 4.32       |
| ii    | 533             | 66.7 | 12.1             | 1.22 | 82.6    | 56.0    | t       | 43.7    | 21.6    | 19.0    | 13.0    | 12.5    | <u>2.05</u> | 1.76    | 1.01    | <b>1.00</b> | 1.62        | 2.10        | 15.2        | 1.90    | 11.6        | 11.1        | 19.9    | 36.2        | 26.6        | 13.0    | 11.9       |
| iii   | 406             | 86.5 | 19.9             | 2.10 | t       | t       | t       | t       | 56.5    | 15.6    | 11.1    | 10.6    | <u>2.22</u> | 2.13    | 1.02    | <b>1.00</b> | 3.05        | 2.48        | 28.5        | 3.33    | m           | m           | m       | m           | m           | m       | m          |
| iv    | 193             | 46.5 | 7.22             | 1.07 | 60.4    | 34.2    | 95.4    | 30.2    | 13.5    | 17.8    | 11.0    | 10.0    | <u>4.49</u> | 2.83    | 1.01    | <b>1.00</b> | 1.15        | 1.34        | 9.19        | 1.32    | 6.93        | 6.43        | 12.0    | 24.9        | 18.6        | 7.51    | 6.32       |
| v     | 197             | 25.2 | 7.16             | 0.55 | 62.1    | 35.1    | 98.1    | 31.1    | 13.7    | 17.3    | 10.7    | 9.79    | <u>4.41</u> | 2.77    | 1.02    | <b>1.00</b> | 1.15        | 1.34        | 9.17        | 1.31    | 7.10        | 6.61        | 12.4    | 25.3        | 19.3        | 7.65    | 6.39       |
| vi    | 287             | 87.0 | 10.6             | 2.04 | 87.0    | 43.8    | 132     | 33.4    | 15.1    | 21.7    | 12.3    | 10.5    | <u>4.39</u> | 2.46    | 1.03    | <b>1.00</b> | 1.24        | 1.39        | 10.4        | 1.43    | 8.42        | 7.78        | 14.7    | 30.7        | 23.2        | 9.13    | 7.45       |
| vii   | 94.0            | 21.8 | 4.17             | 0.41 | 71.7    | 36.2    | 105     | 28.0    | 12.6    | 15.6    | 9.18    | 7.83    | <u>4.85</u> | 2.80    | 1.02    | <b>1.00</b> | 1.25        | 1.37        | 9.10        | 1.39    | 7.23        | 6.71        | 11.9    | 19.2        | 18.3        | 6.08    | 4.86       |
| viii  | 87.9            | 17.1 | 3.10             | 0.33 | 50.8    | 20.9    | 50.3    | 16.3    | 6.43    | 25.0    | 11.5    | 8.33    | 15.1        | 5.10    | 5.18    | 4.90        | 1.16        | <b>1.00</b> | <u>6.69</u> | 1.45    | 3.24        | 3.09        | 7.17    | 16.5        | 11.8        | 5.40    | 4.23       |
| ix    | 51.1            | 5.74 | 1.28             | 0.07 | 48.7    | 20.8    | 44.6    | 17.6    | 6.10    | 24.3    | 11.7    | 7.40    | 23.0        | 6.90    | 5.01    | 4.80        | 1.21        | <b>1.00</b> | <u>6.13</u> | 1.51    | 2.92        | 2.73        | 6.39    | 15.2        | 9.73        | 4.30    | 3.51       |
| x     | 201             | 41.6 | 12.5             | 1.30 | 102     | 42.0    | 90.3    | 30.7    | 11.3    | 50.6    | 22.7    | 12.9    | 12.6        | 3.54    | 1.96    | 1.91        | <b>1.00</b> | 1.11        | <u>6.93</u> | 1.36    | 4.28        | 3.95        | 7.80    | 16.9        | 13.1        | 5.41    | 4.64       |
| xi    | 46.6            | 8.49 | 1.17             | 0.07 | 37.7    | 15.7    | 29.1    | 9.82    | 3.79    | 29.2    | 14.2    | 7.16    | 17.8        | 4.42    | 5.75    | 5.61        | 1.23        | <b>1.00</b> | <u>4.97</u> | 1.72    | 1.73        | 1.66        | 5.48    | 9.12        | 6.47        | 3.32    | 2.77       |
| xii   | 32.8            | 3.81 | 1.87             | 0.07 | 73.4    | 31.5    | 47.5    | 15.0    | 6.86    | 28.9    | 8.55    | 4.36    | 9.20        | 2.09    | 1.99    | 1.95        | 1.04        | <b>1.00</b> | <u>4.60</u> | 1.37    | 2.17        | 2.03        | 12.8    | 6.60        | 5.04        | 2.07    | 1.57       |
| xiii  | 738             | 108  | 382              | 31.1 | t       | t       | t       | t       | t       | t       | t       | t       | t           | t       | t       | t           | 1.14        | <b>1.00</b> | t           | 1.87    | m           | m           | m       | m           | m           | m       | m          |
| xiv   | 58.9            | 7.76 | 5.05             | 0.21 | 88.2    | 26.8    | 43.5    | 14.0    | 5.87    | 55.6    | 16.9    | 8.14    | 57.4        | 8.18    | 7.97    | 7.67        | 1.36        | <b>1.00</b> | <u>5.15</u> | 2.47    | 1.75        | 1.46        | 5.77    | 5.68        | 6.33        | 3.05    | 1.96       |
| xv    | 181             | 41.5 | 15.8             | 1.93 | t       | 58.0    | 92.7    | 29.6    | 14.4    | 109     | 33.1    | 15.5    | 59.1        | 8.08    | 11.0    | 10.6        | 1.07        | <b>1.00</b> | <u>5.77</u> | 1.84    | 2.60        | 2.49        | 7.56    | 14.6        | 9.56        | 5.30    | 4.14       |
| xvi   | 224             | 55.8 | 46.6             | 4.86 | t       | t       | t       | t       | t       | t       | 29.0    | 13.9    | t           | 9.61    | 2.98    | 2.88        | 1.03        | <b>1.00</b> | <u>6.18</u> | 1.55    | m           | m           | m       | m           | m           | m       | m          |
| xvii  | 145             | 32.9 | 249              | 11.2 | t       | t       | m       | t       | t       | t       | t       | t       | t           | t       | t       | 7.87        | <b>1.00</b> | m           | m           | 1.73    | m           | m           | m       | m           | m           | m       | m          |
| xviii | 114             | 11.9 | 33.7             | 1.18 | t       | 24.7    | 38.8    | 13.1    | 6.47    | 59.0    | 16.6    | 8.16    | 58.6        | 7.89    | 8.20    | 8.00        | 1.33        | <b>1.00</b> | 5.11        | 2.80    | 1.47        | 1.27        | 3.99    | <u>3.13</u> | 4.30        | 2.24    | 1.71       |
| xix   | 612             | 160  | 587              | 76.3 | t       | t       | t       | t       | t       | t       | t       | t       | t           | t       | t       | t           | 1.09        | <b>1.00</b> | t           | 2.63    | m           | m           | m       | m           | m           | m       | m          |
| xx    | 18.0            | 1.00 | 0.71             | 0.03 | 98.1    | 27.1    | 42.4    | 15.6    | 10.2    | 61.6    | 16.7    | 7.37    | 20.8        | 2.65    | 2.13    | 2.17        | 1.29        | 1.24        | 4.47        | 2.17    | <b>1.00</b> | 1.06        | 8.31    | 3.50        | <u>2.32</u> | 1.35    | 1.38       |
| xxi   | 76.1            | 14.4 | 31.7             | 2.73 | t       | 39.9    | t       | 23.1    | 7.92    | t       | 26.0    | 10.0    | t           | 10.1    | 9.98    | 9.63        | 1.75        | 1.38        | 6.41        | 4.85    | 1.39        | <b>1.00</b> | 5.51    | 3.44        | <u>2.90</u> | 1.92    | 1.37       |
| xxii  | 54.8            | 11.0 | 23.0             | 1.90 | t       | 64.5    | t       | 38.1    | 13.8    | t       | 42.4    | 15.3    | t           | 14.8    | 14.6    | 14.2        | 2.10        | 1.52        | 6.49        | 5.53    | 1.82        | <b>1.00</b> | 9.85    | 3.56        | <u>2.61</u> | 2.04    | 1.22       |

Table 3: As per Table 2, but with  $k = 1000$
